# Supplementary material
Source: MDPI journal article supplement (https://www.mdpi.com/1424-8247/14/11/1176)

## Supporting Information

### **Inhibitory effect of chlorogenic acid analogues comprising pyridine and pyrimidine on $\alpha$ -MSH-stimulated melanogenesis and stability of acyl analogues**

in methanol Jaeuk Sim,<sup>a, †</sup> Lanka Srinu,<sup>a, †</sup> Jo Jeongwoong,<sup>a</sup> Chhabi Lal Chaudhary,<sup>a</sup> Manjunatha Vishwanath,<sup>a</sup> Chanhyun Jung,<sup>a</sup> Young Hee Lee,<sup>a, b</sup> Eun-yeong Kim,<sup>c</sup> Youngsoo Kim,<sup>a</sup> Soonsil Hyun,<sup>a</sup> Heesoon Lee,<sup>a</sup> Kiho Lee,<sup>c</sup> Seung-Yong Seo,<sup>d</sup> Mayavan Viji,<sup>a, \*</sup> Jae-Kyung Jung,<sup>a, \*</sup>

<sup>a</sup> College of Pharmacy and Medicinal Research Center (MRC), Chungbuk National University, Cheongju 28160, Republic of Korea

<sup>b</sup> Samjin Central Research Institute, Samjin Pharma Co., LTD, Cheongju 28158, Republic of Korea

<sup>c</sup> College of Pharmacy, Korea University, Sejong 30019, Republic of Korea

<sup>d</sup> College of Pharmacy and Gachon Institute of Pharmaceutical Sciences, Gachon University, Incheon 21936, Republic of Korea

<sup>†</sup> both the authors equally contributed

Corresponding author. Tel.: +82-43-261-2635; fax: +82-43-268-2732. E-mail: orgjkjung@chungbuk.ac.kr (J.-K. Jung); Email: cheviji@gmail.com (M. Viji)

| <b>Contents</b>                  | <b>Page</b> |
|----------------------------------|-------------|
| <b>1. NMR Spectra</b>            | <b>2</b>    |
| <b>2. IC<sub>50</sub> Values</b> | <b>21</b>   |

# 1. NMR Spectra

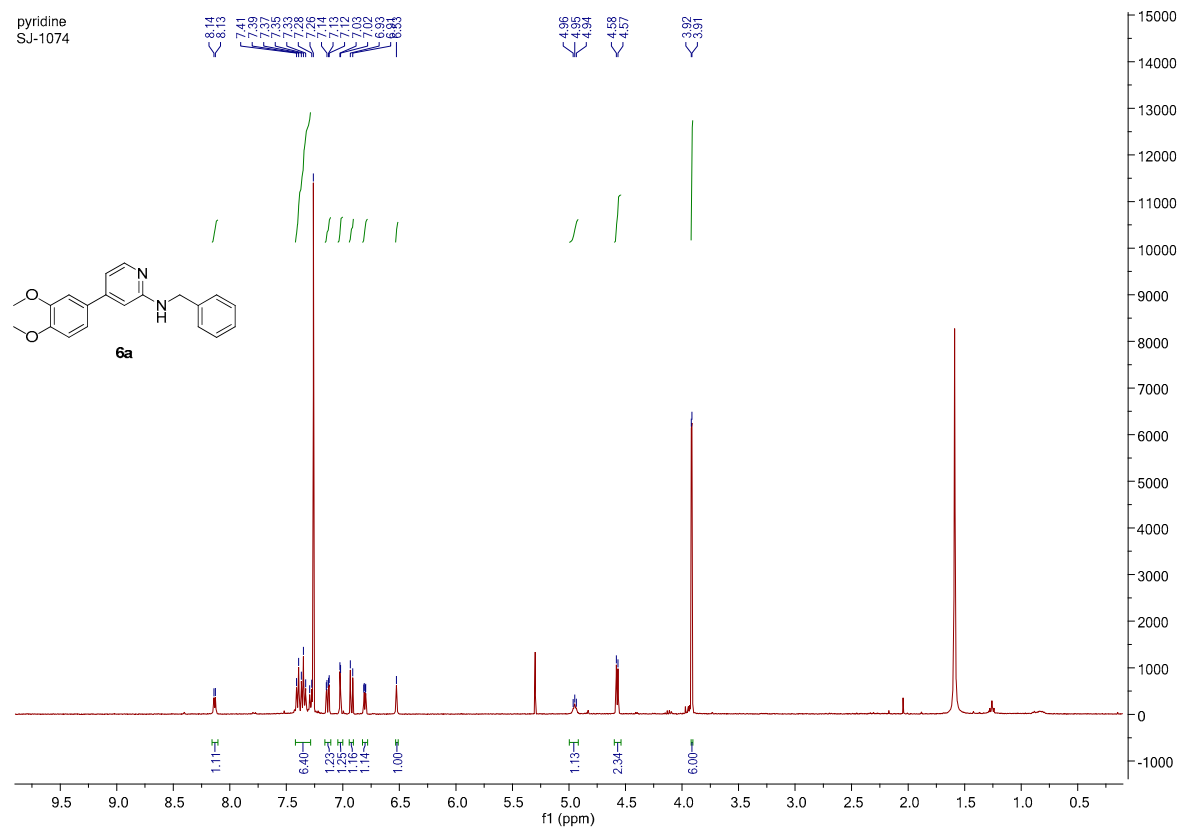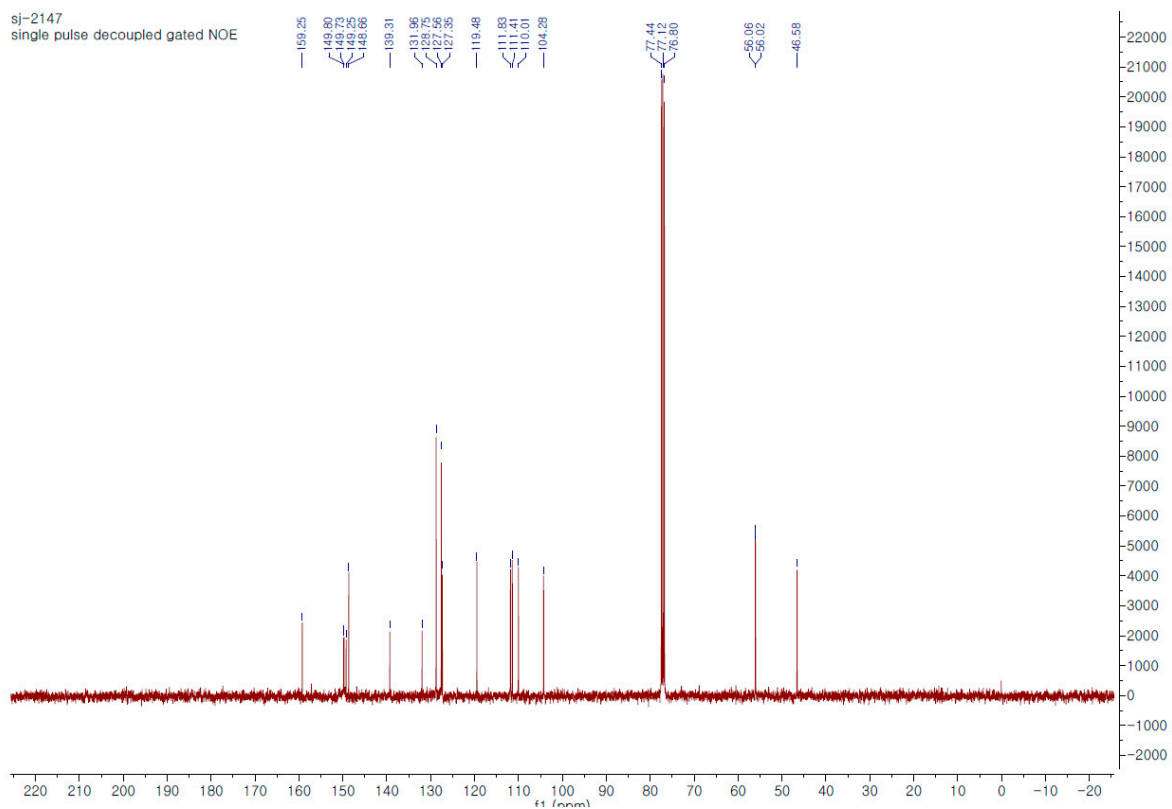

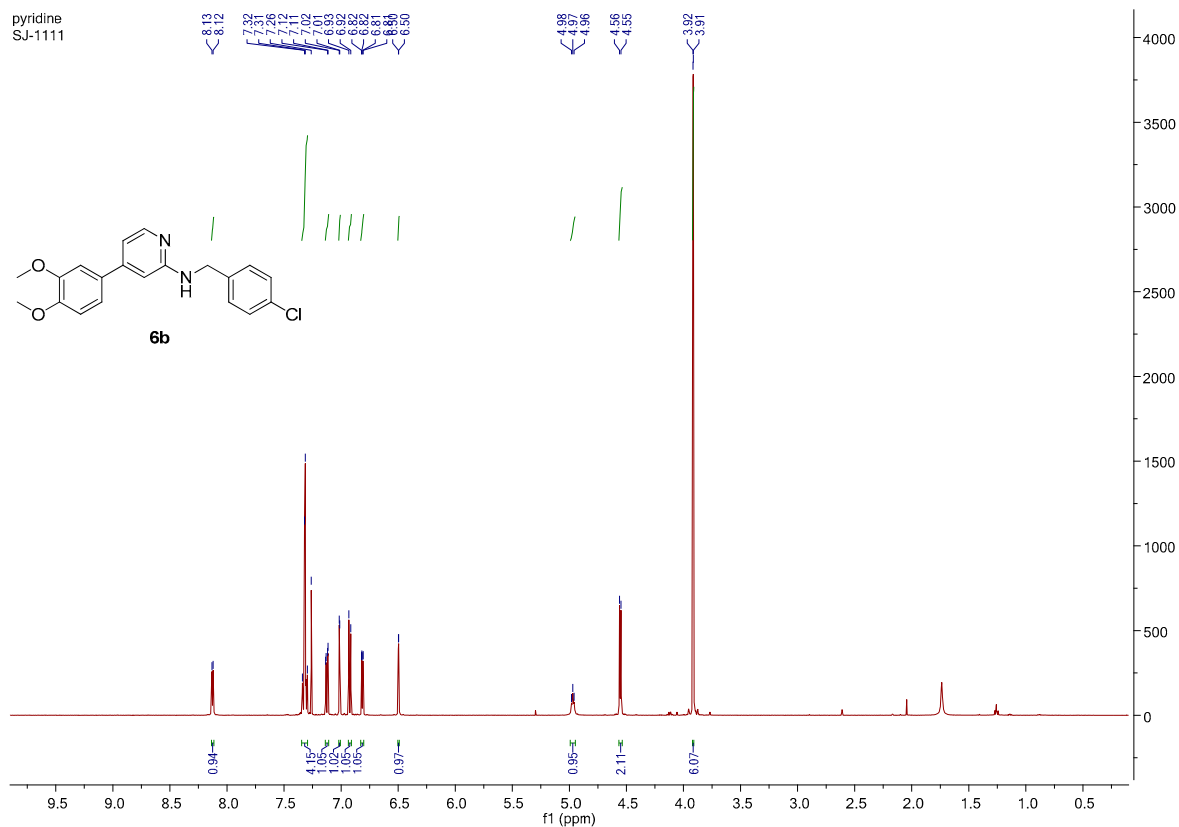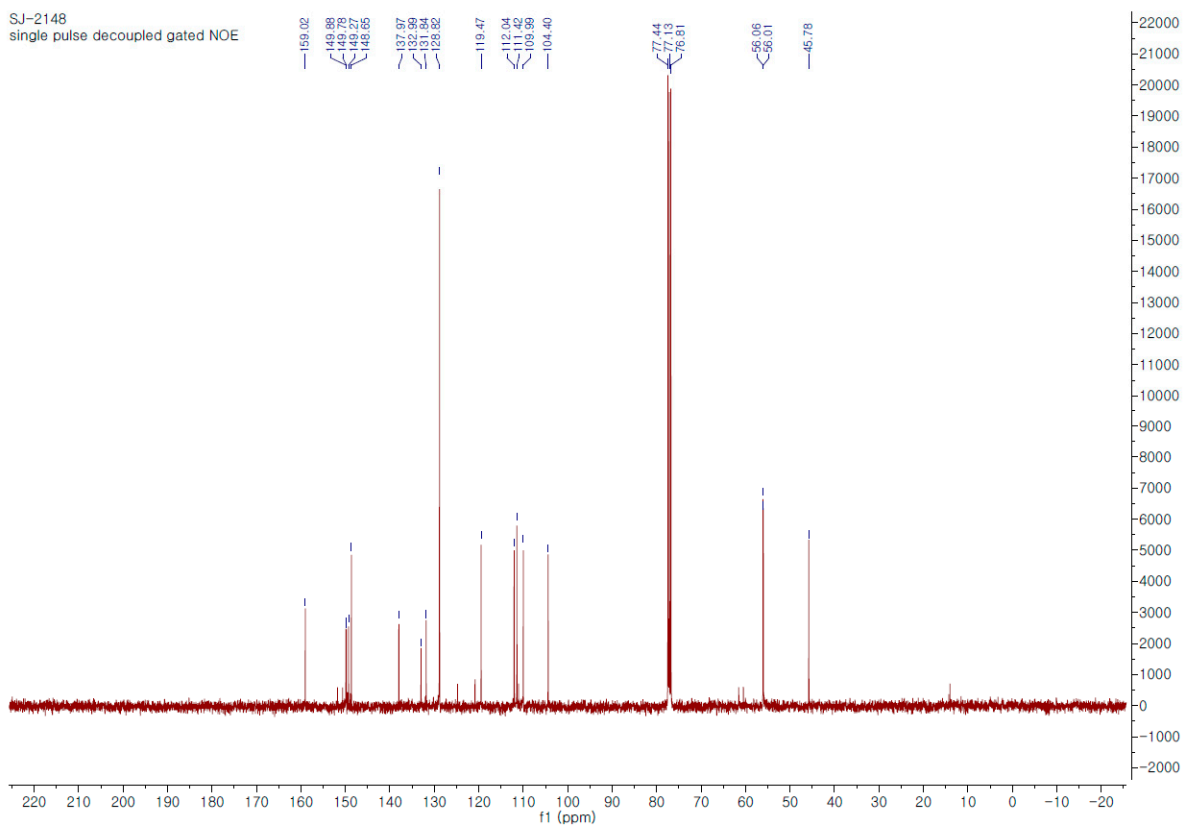

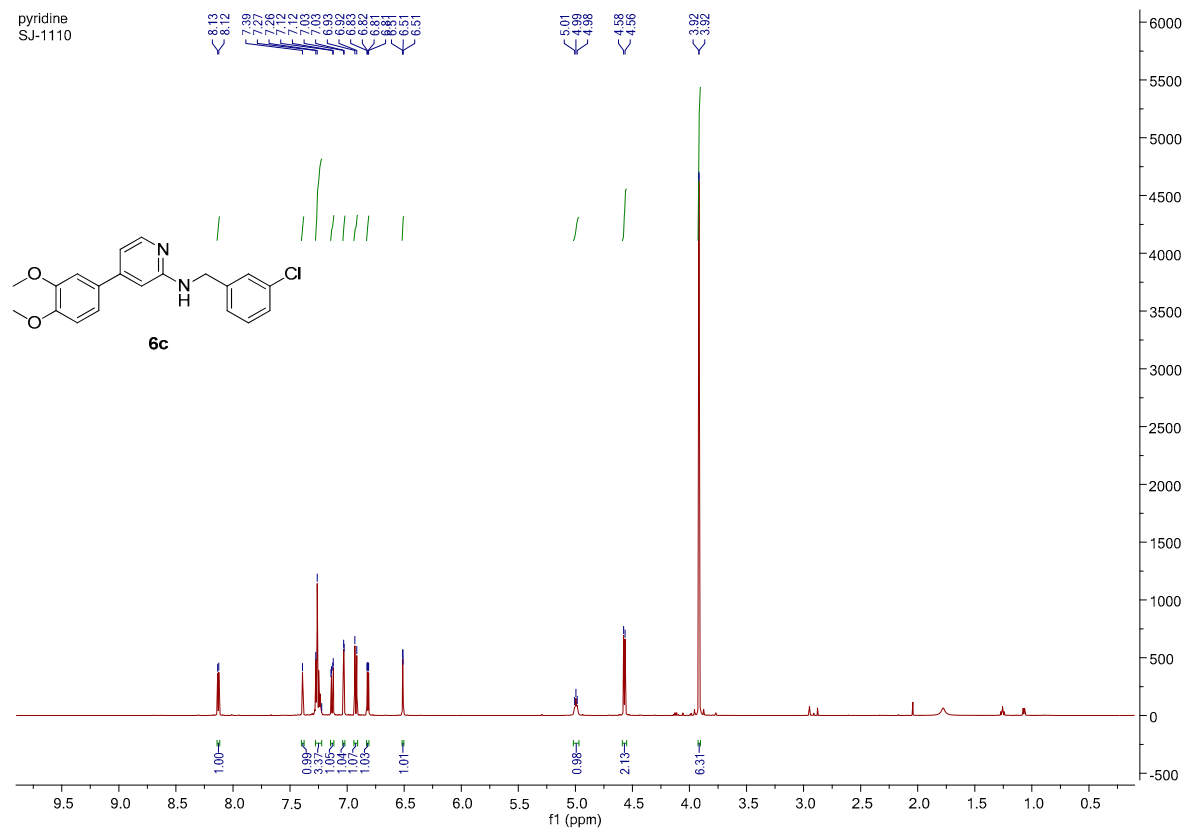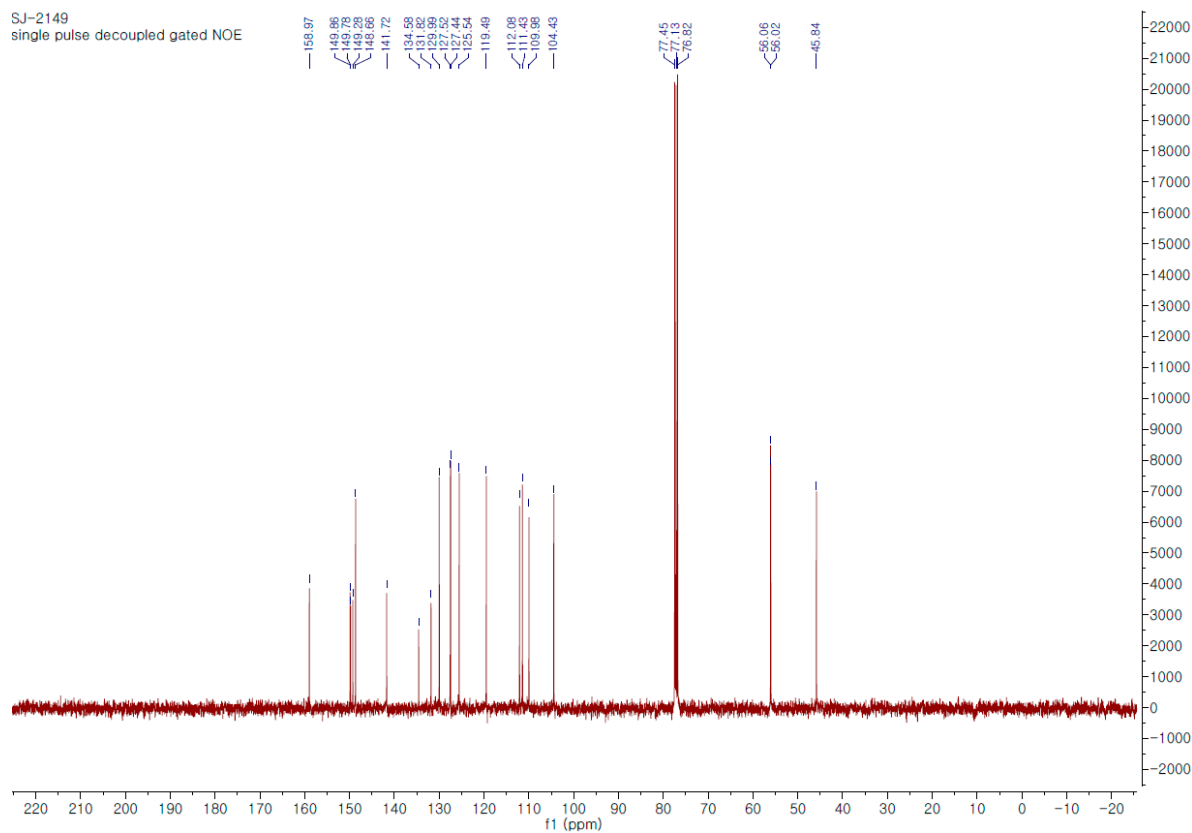

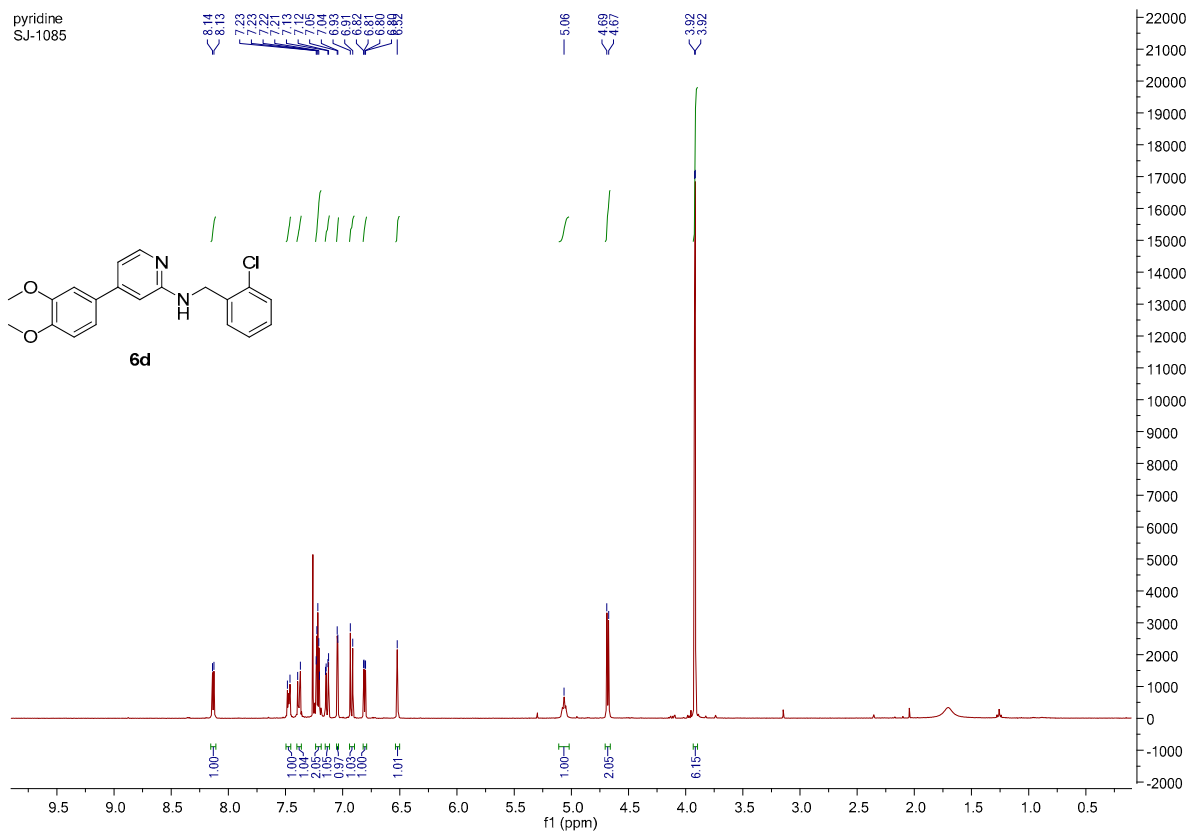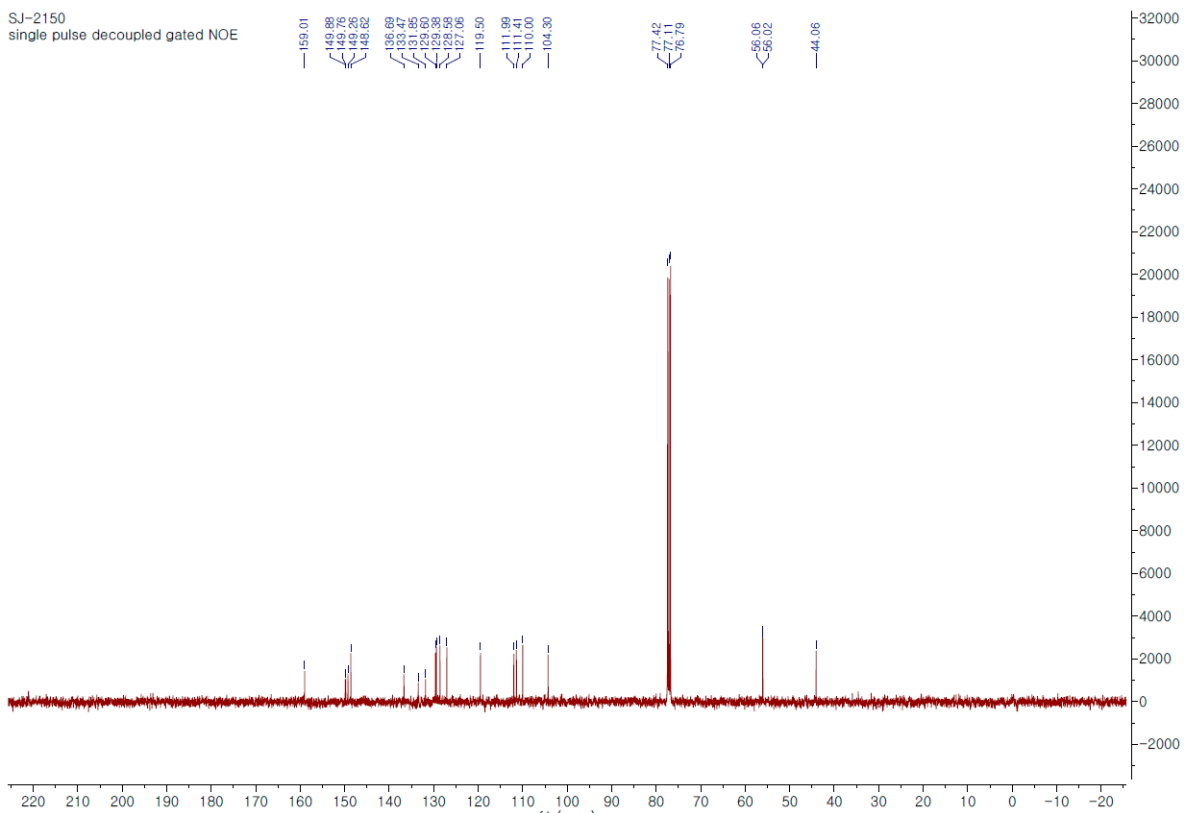

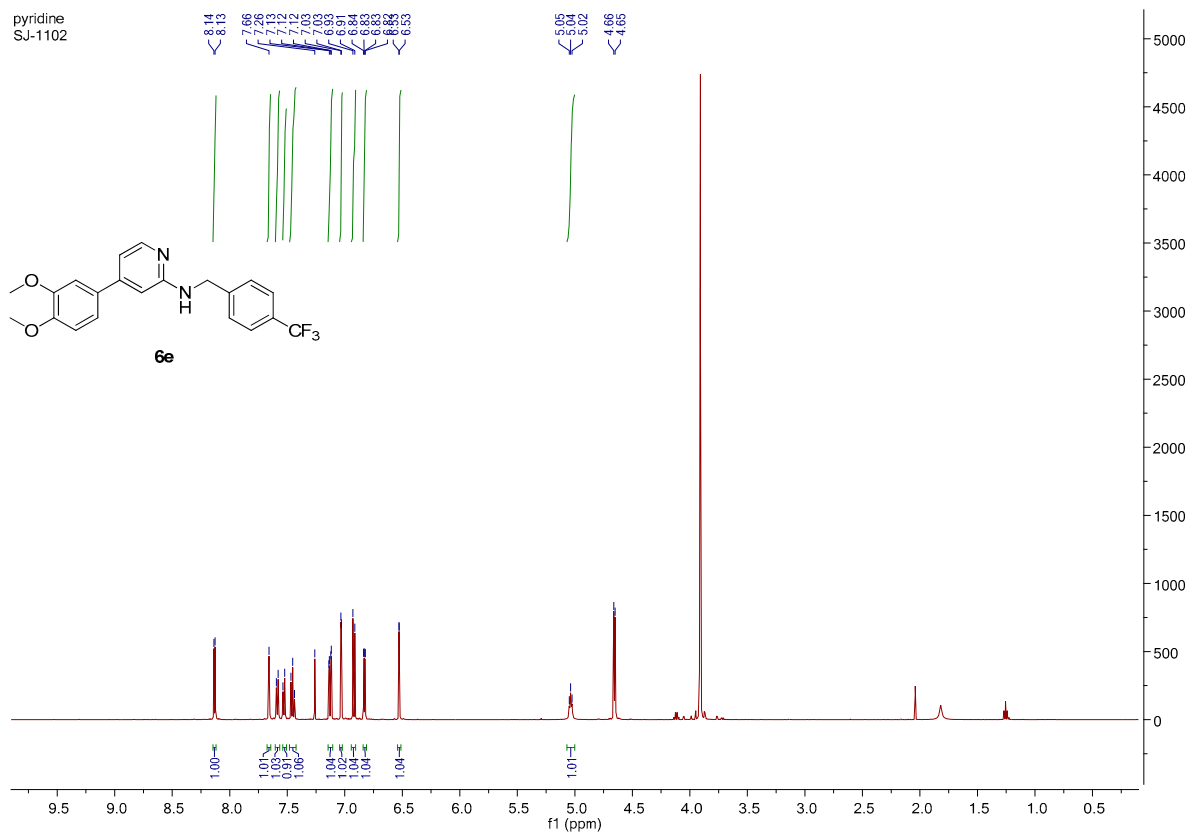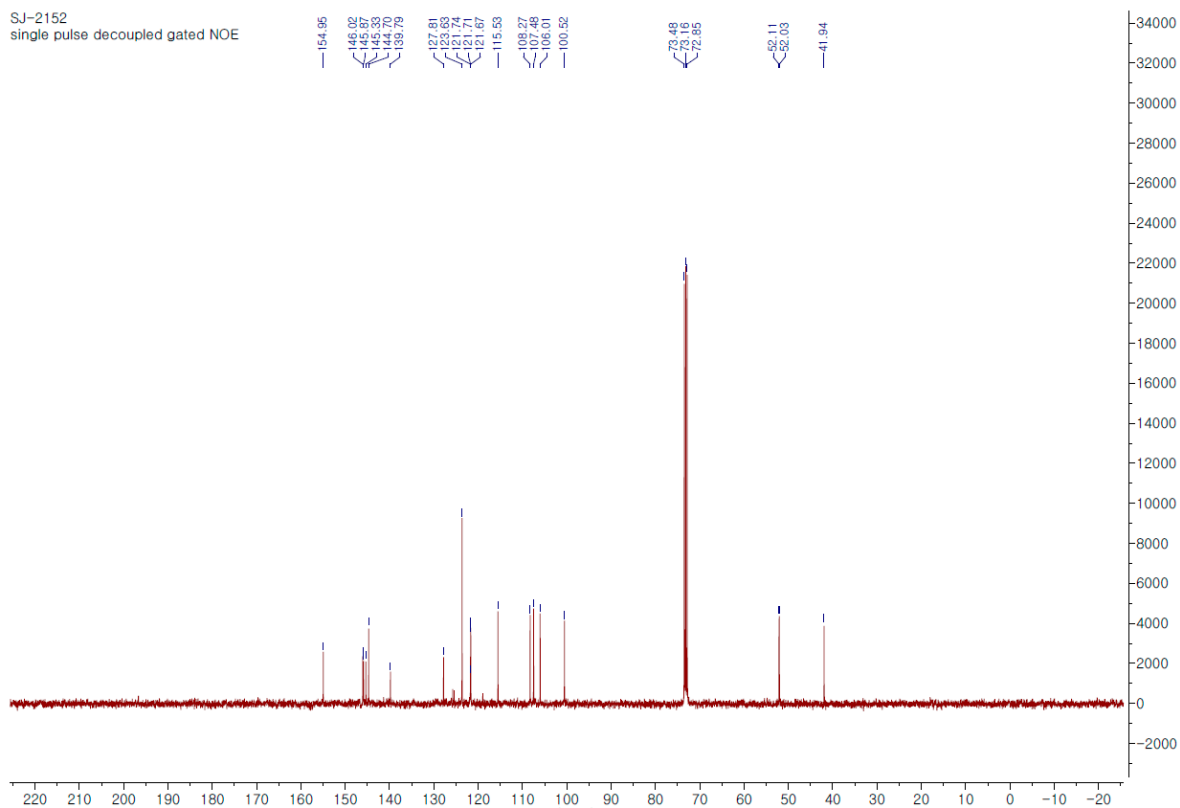

3  
SJ-1102

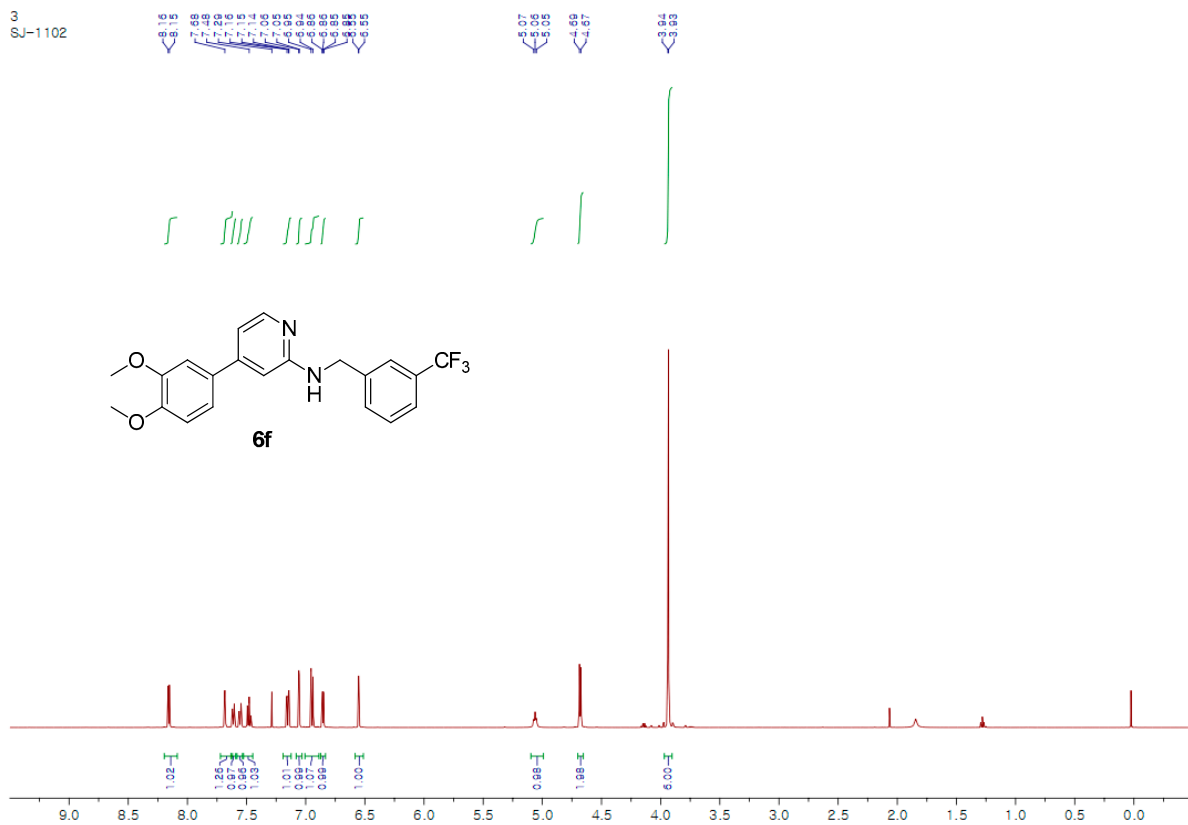

SJ-2151  
single pulse decoupled gated

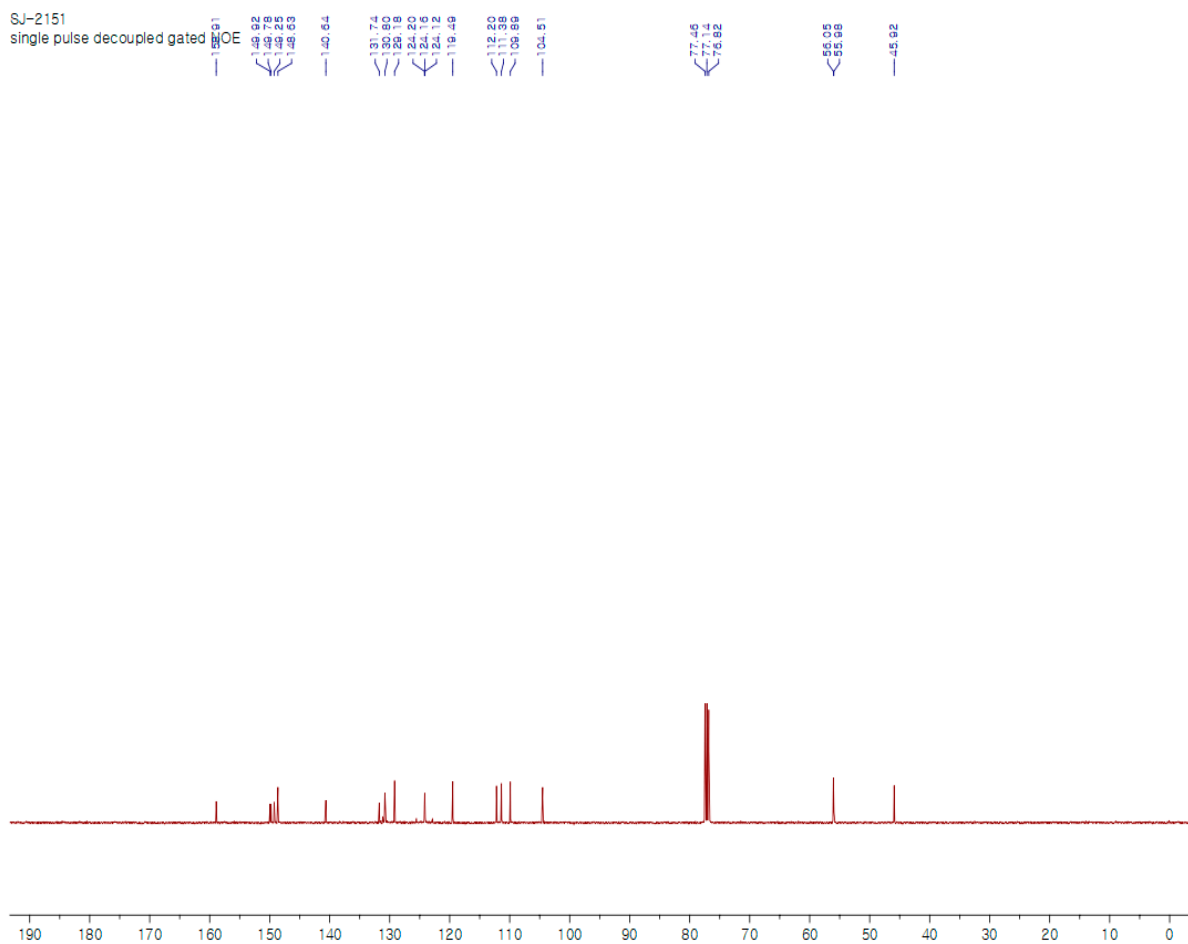

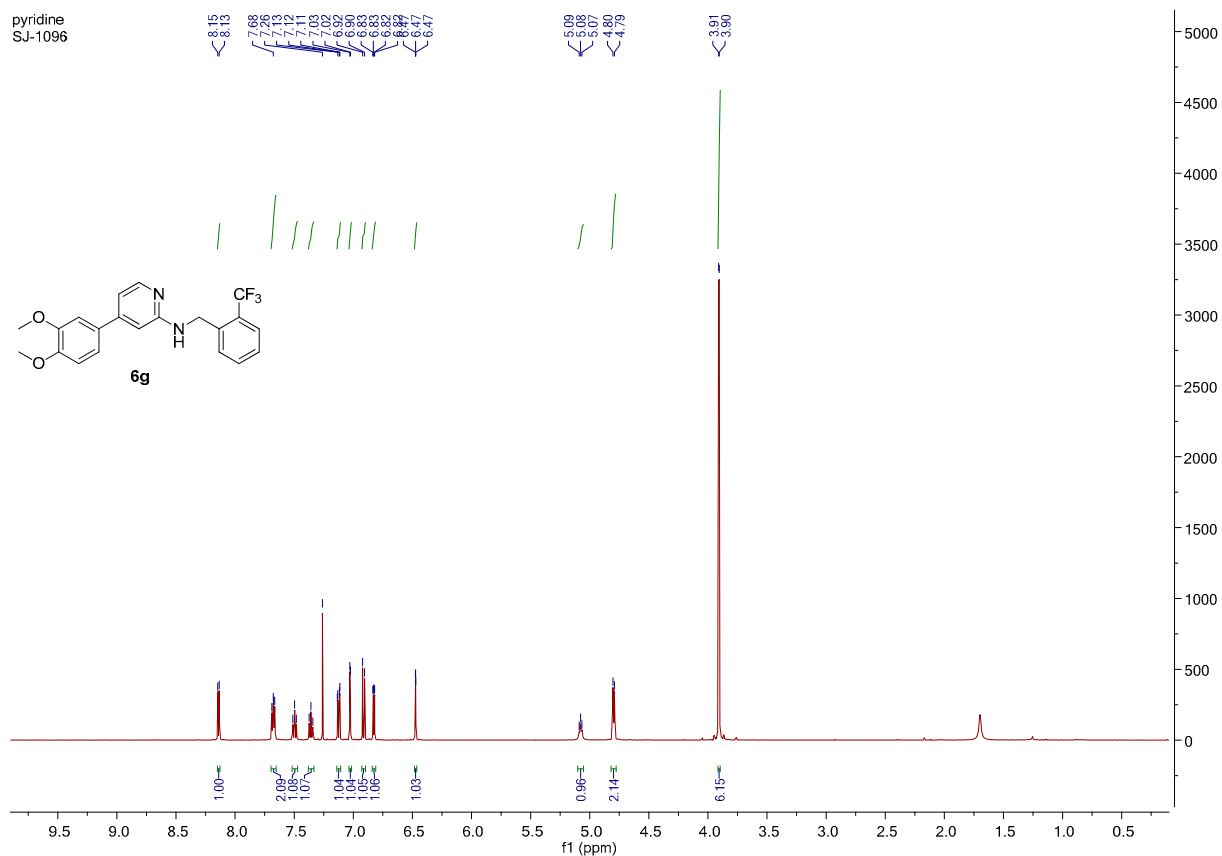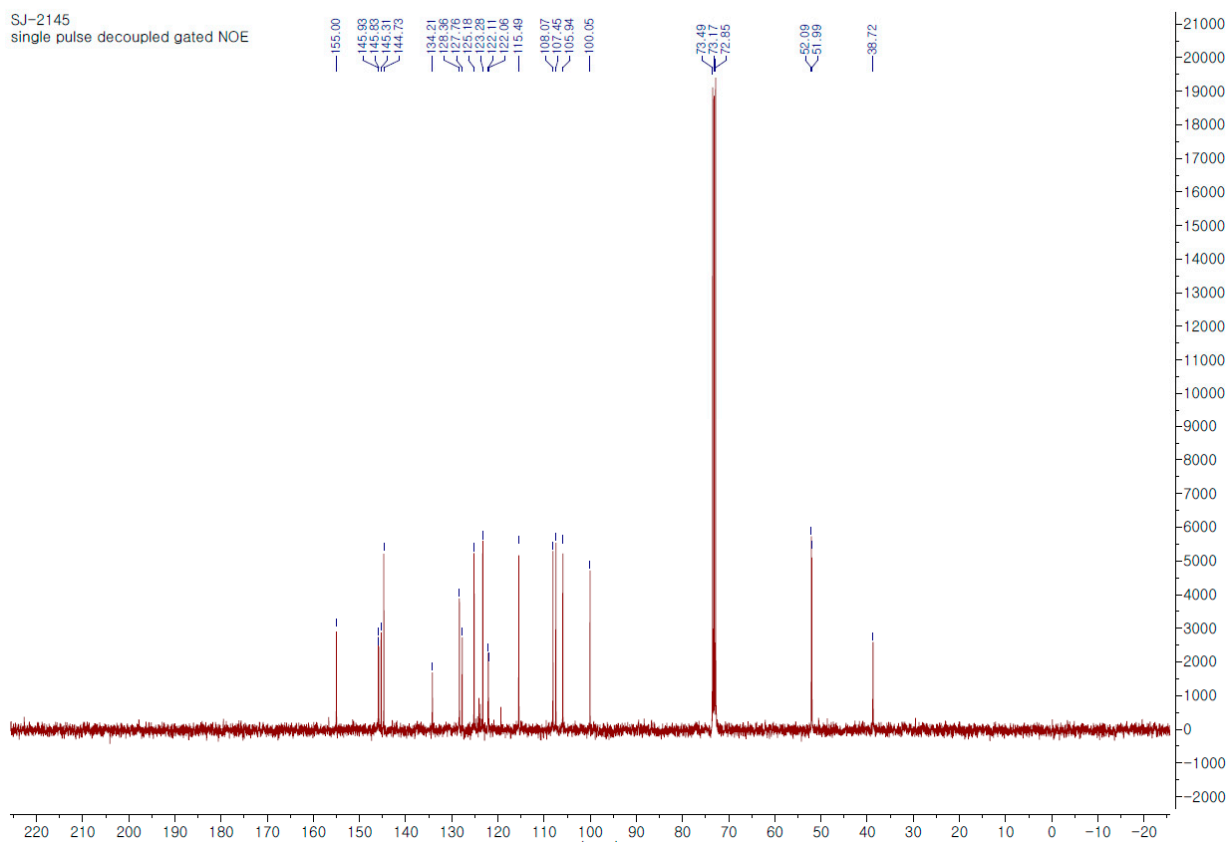



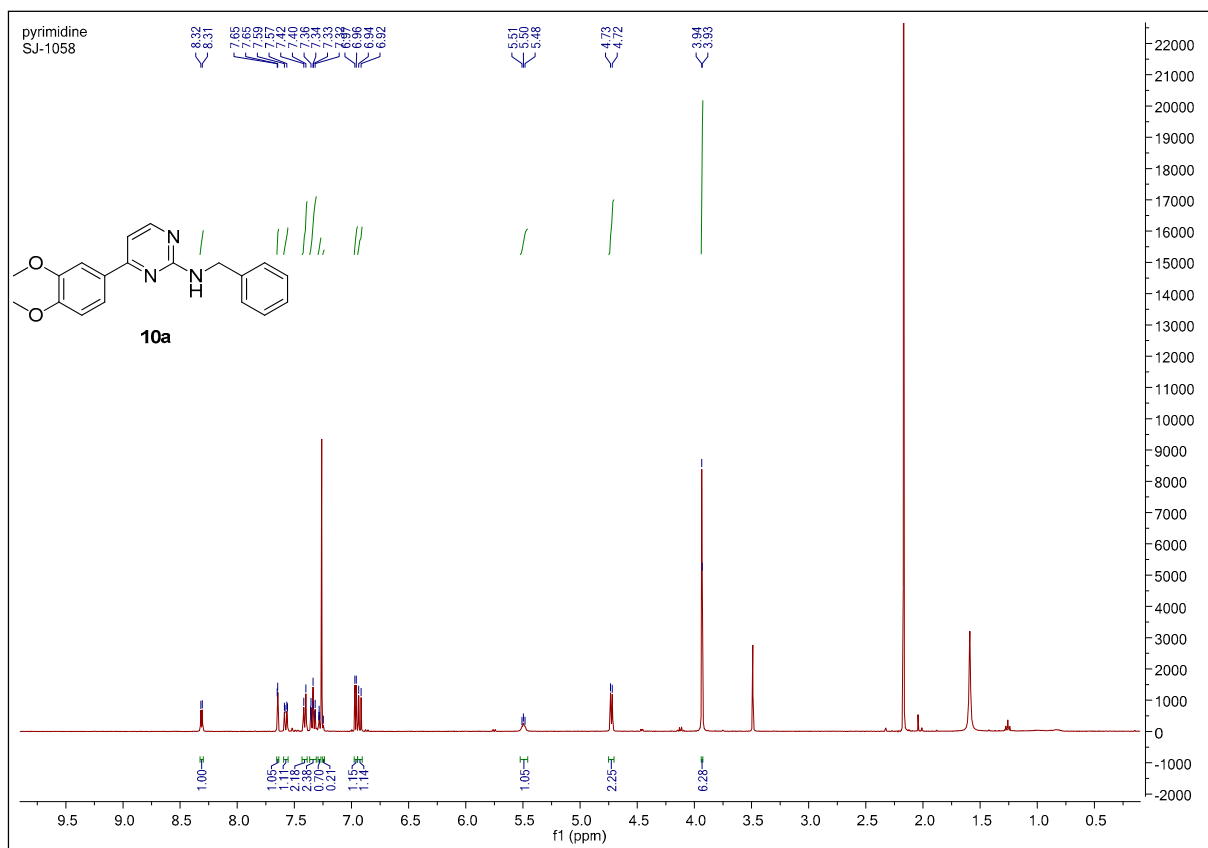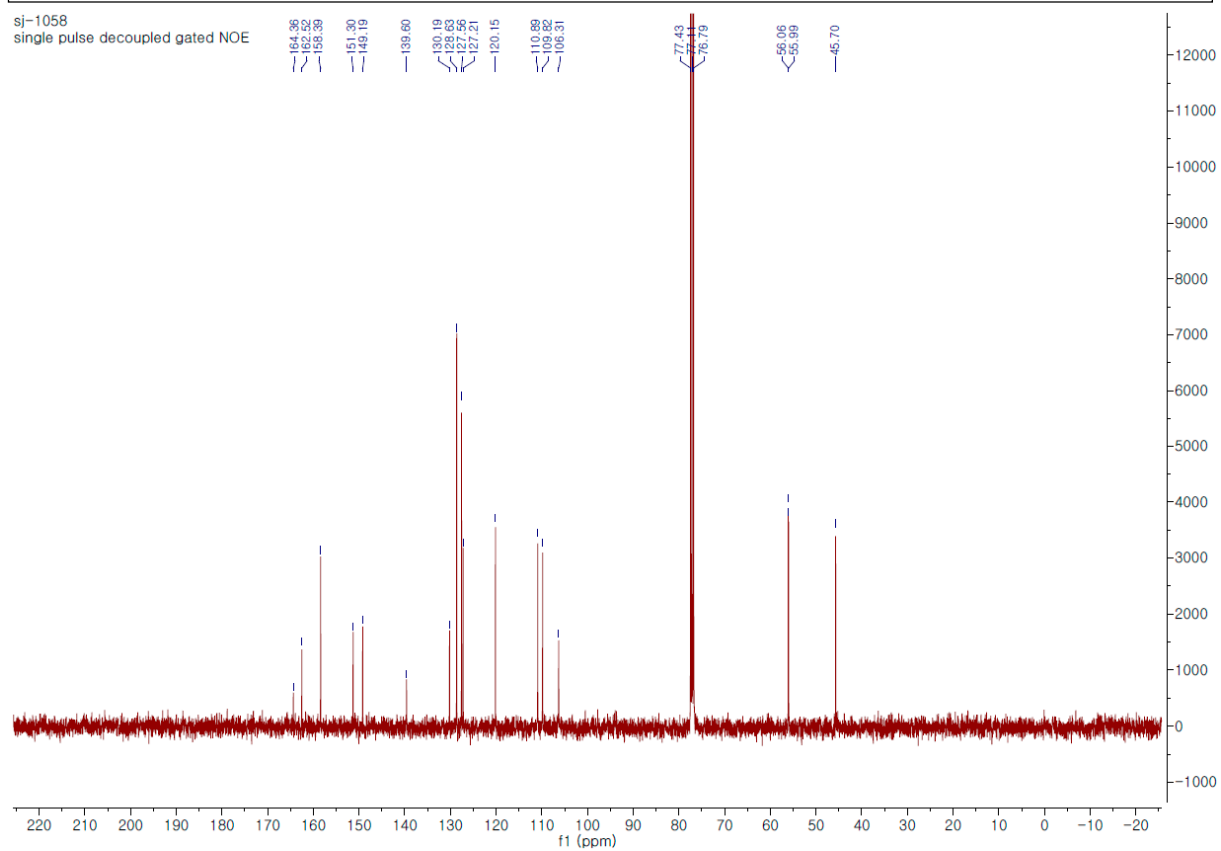

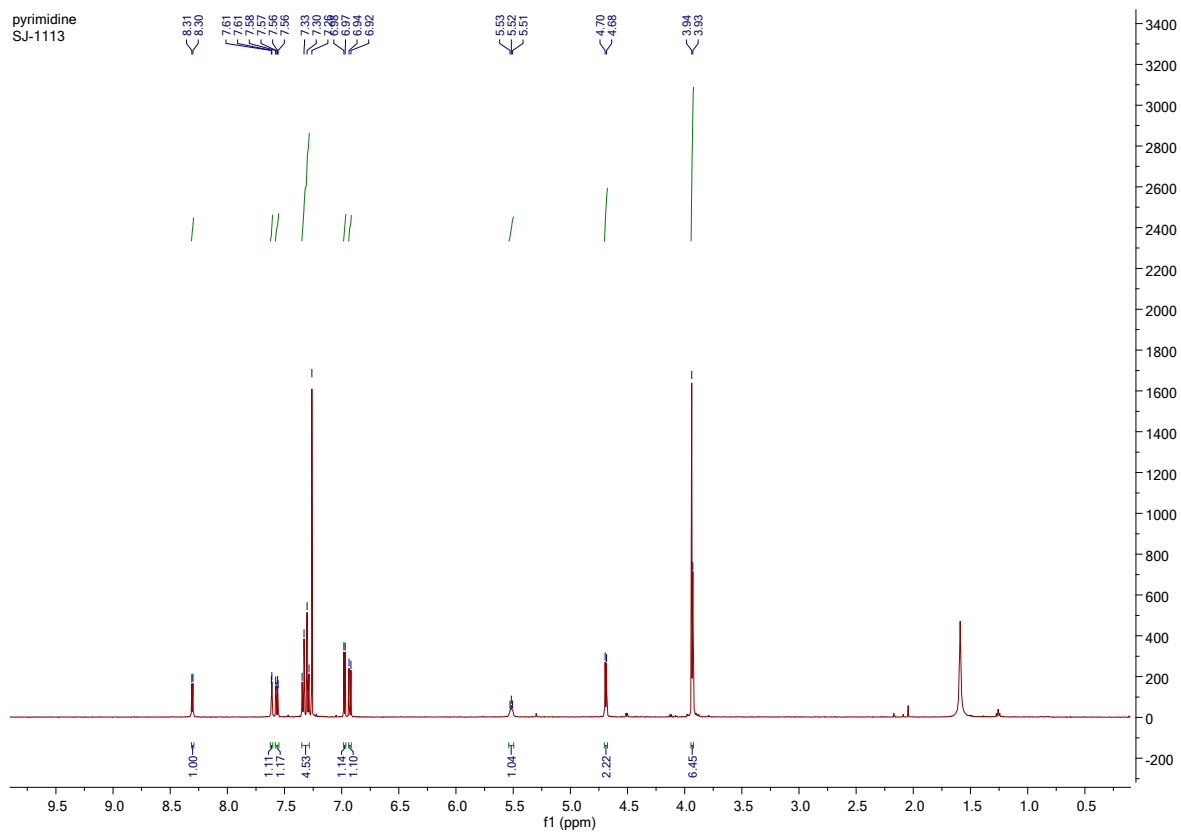

Supplement: s1 [file s1]
